# Supplementary material
Source: MDPI journal article supplement (https://www.mdpi.com/search?q=biomimetics-04-00005)
Supplement: s001 [file biomimetics-04-00005-s001.pdf]

# **Supplementary Materials: The Effect of Chloride Anions on Charge Transfer in Dye-Sensitized Photoanodes for Water Splitting**

**Iwona Grądzka, Mateusz Gierszewski and Marcin Ziótek \***

Quantum Electronics Laboratory, Faculty of Physics, Adam Mickiewicz University, ul. Umultowska 85, PL-61614 Poznań, Poland; iwona.gradzka@amu.edu.pl (I.G.); mgiersz@amu.edu.pl (M.G.)

\* Correspondence: marziol@amu.edu.pl

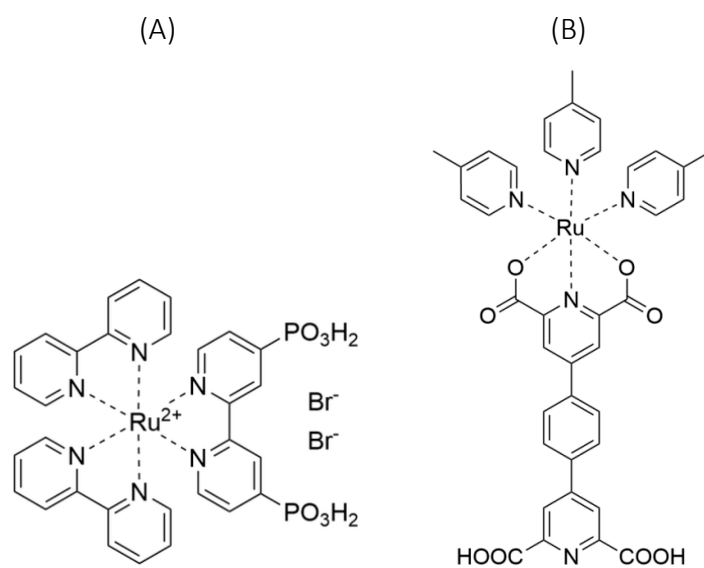

**Figure S1.** The chemical structures of (A) RuP and (B) RuOEC.

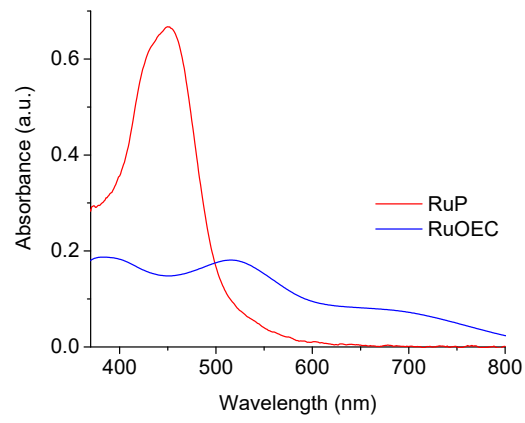

**Figure S2.** Absorption spectra of photoanodes sensitized in RuP (for 16h) and RuOEC (for 16h).

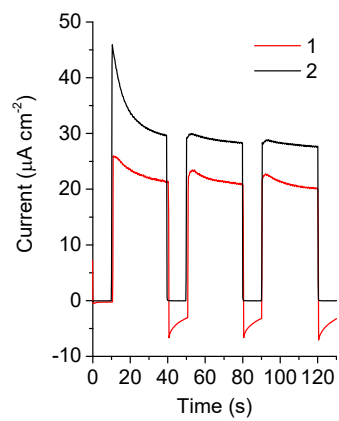

**Figure S3.** Photocurrent–time behaviour of TiO<sub>2</sub> in HCl (pH  $\approx$ 3) (1) and 0.07 M phosphate buffer (pH  $\approx$ 7) solution (2). The photoanodes were biased at 0.236 V vs. NHE.

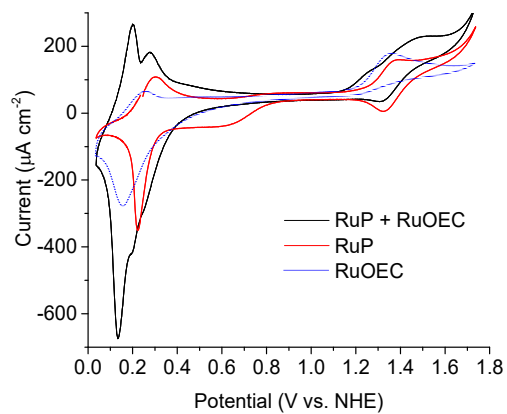

**Figure S4.** Cyclic voltammograms of  $\text{TiO}_2$  photoanode sensitized with RuP, RuOEC and RuP + RuOEC recorded under illumination in HCl electrolyte (pH  $\approx$ 3).

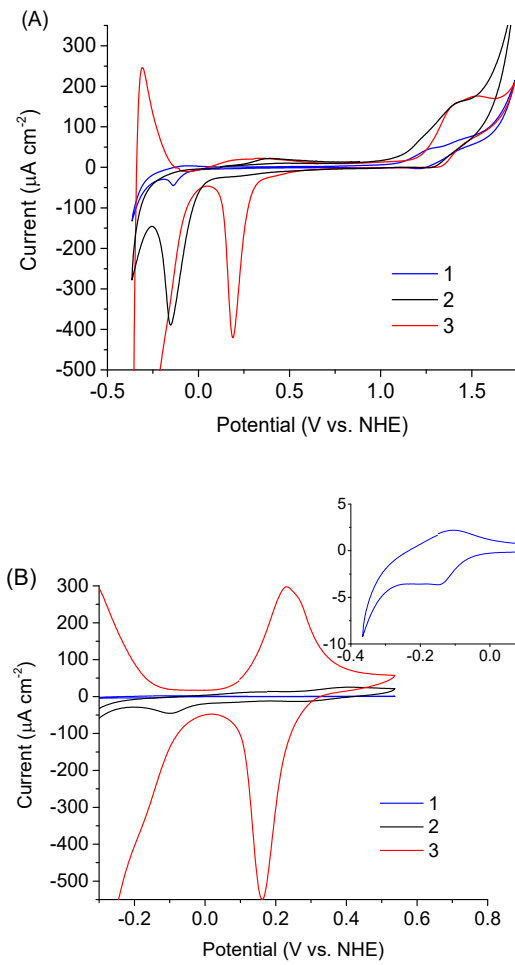

**Figure S5.** Cyclic voltammograms of TiO<sub>2</sub> photoanode sensitized with RuP + RuOEC in electrolytes: 0.07 M phosphate buffer (pH ≈7) (1), 0.1 M KCl (pH ≈5) (2), and 0.001 M HCl (pH ≈3) (3) recorded (A) in dark condition and (B) upon illumination when UV cut-off filter was used.

**Table S1.** Parameters of the time traces of the photocurrent recorded at 0.236 V vs. NHE.

| Type of Photoanode | Electrolyte             | pH          | $J_0$ ( $\mu\text{A}/\text{cm}^2$ ) | $J_{\text{stab}}$ ( $\mu\text{A}/\text{cm}^2$ ) | $J_{\text{dark}}$ ( $\mu\text{A}/\text{cm}^2$ ) | $J_{\text{stab}}/J_0$ |
|--------------------|-------------------------|-------------|-------------------------------------|-------------------------------------------------|-------------------------------------------------|-----------------------|
| RuOEC              | 0.001 M HCl             | $\approx 3$ | 220                                 | 5                                               | -120                                            | 0.02                  |
| RuP                |                         |             | 10                                  | 0                                               | -80                                             | 0                     |
| RuP + RuOEC        |                         |             | 640                                 | 5                                               | -140                                            | 0.01                  |
| TiO <sub>2</sub>   |                         |             | 25                                  | 20                                              | -5                                              | 0.80                  |
| RuOEC              | 0.07 M Phosphate buffer | $\approx 7$ | 65                                  | 30                                              | 0                                               | 0.46                  |
| RuP                |                         |             | 55                                  | 15                                              | -20                                             | 0.27                  |
| RuP + RuOEC        |                         |             | 240                                 | 50                                              | -20                                             | 0.20                  |
| TiO <sub>2</sub>   |                         |             | 45                                  | 30                                              | 0                                               | 0.67                  |

$J_0$ : Initial photocurrent;  $J_{\text{stab}}$ : Steady-state photocurrent;  $J_{\text{dark}}$ : Dark photocurrent;  $J_{\text{stab}}/J_0$ : Ratio for the photoanode sensitized with RuOEC, RuP and both.

**Table S2.** Parameters of the time traces of the photocurrent recorded at 0.736 V vs. NHE.

| Type of Photoanode | Electrolyte             | pH          | $J_0$ ( $\mu\text{A}/\text{cm}^2$ ) | $J_{\text{stab}}$ ( $\mu\text{A}/\text{cm}^2$ ) | $J_{\text{dark}}$ ( $\mu\text{A}/\text{cm}^2$ ) | $J_{\text{stab}}/J_0$ |
|--------------------|-------------------------|-------------|-------------------------------------|-------------------------------------------------|-------------------------------------------------|-----------------------|
| RuOEC              |                         |             | 290                                 | 40                                              | -45                                             | 0.14                  |
| RuP                | 0.001 M HCl             | $\approx 3$ | 70                                  | 10                                              | -10                                             | 0.14                  |
| RuP + RuOEC        |                         |             | 420                                 | 25                                              | -5                                              | 0.06                  |
| RuOEC              |                         |             | 25                                  | 25                                              | 0                                               | 1                     |
| RuP                | 0.07 M Phosphate buffer | $\approx 7$ | 85                                  | 30                                              | -5                                              | 0.35                  |
| RuP + RuOEC        |                         |             | 60                                  | 35                                              | 0                                               | 0.58                  |

$J_0$ : Initial photocurrent;  $J_{\text{stab}}$ : Steady-state photocurrent;  $J_{\text{dark}}$ : Dark photocurrent;  $J_{\text{stab}}/J_0$ : Ratio for the photoanode sensitized with RuOEC, RuP and both.



**Table S3.** Onset of cathodic current peak obtained from CV skans recorded in dark conditions (from -0.36 to 1.74 V vs. NHE) for RuP + RuOEC photoanodes in different electrolytes.

| Electrolyte             | Molar Ionic Strength (M) | pH | Onset of Cathodic Current (V vs. NHE) <sup>1</sup> |
|-------------------------|--------------------------|----|----------------------------------------------------|
| 0.07 M Phosphate buffer | 0.15                     | ≈7 | -0.06                                              |
| 0.1 M KCl               | 0.1                      | ≈5 | -0.02                                              |
| 0.001 M HCl             | 0.001                    | ≈3 | 0.28                                               |
| EPA                     | ≈0.001                   |    | 0.11                                               |
| EPA + 0.001 M KCl       | ≈0.002                   |    | 0.13                                               |
| EPA + 0.01 M KCl        | ≈0.011                   | ≈3 | 0.13                                               |
| EPA + 0.1 M KCl         | ≈0.101                   |    | 0.12                                               |

<sup>1</sup> Relative error ±0.01 V.
